# Supplementary material
Source: Research Square preprint supplement (doi:10.21203/rs.3.rs-9157516/v1)
Supplement: Supplementary file 1 [file 524dd28bdf633c4979301175.pdf]

**Supplemental Information for:**

**Establishment of a non-invasive age estimation method  
based on fecal DNA methylation levels in brown bears**

Satoshi Ohara, Shiori Nakamura, Kyogo Hagino, Yuu Yoshimi, Naoya Matsumoto,  
Masami Yamanaka, Masanao Nakanishi, Sei Watanabe, Hideyuki Ito,  
Miho Murayama-Inoue, Toshio Tsubota, Jumpei Yamazaki, Michito Shimozuru

**Table of Contents:**

|                                  |                |
|----------------------------------|----------------|
| <b>Supplementary Table S_M1</b>  | <b>Page 2</b>  |
| <b>Supplementary Table S_M2</b>  | <b>Page 7</b>  |
| <b>Supplementary Table S_M3</b>  | <b>Page 8</b>  |
| <b>Supplementary Table S_R1</b>  | <b>Page 9</b>  |
| <b>Supplementary Table S_R2</b>  | <b>Page 10</b> |
| <b>Supplementary Table S_R3</b>  | <b>Page 11</b> |
| <b>Supplementary Figure S_M1</b> | <b>Page 12</b> |
| <b>Supplementary Figure S_M2</b> | <b>Page 13</b> |
| <b>Supplementary Figure S_R1</b> | <b>Page 14</b> |

**Supplementary Table S\_M1.** Sample list for methylation level analysis.

| Captive/Wild | Sampling date | Bear ID | Age (years) | Sex | Analysis |
|--------------|---------------|---------|-------------|-----|----------|
| Captive      | 2025/7/3      | M0A     | 0.416       | M   | C        |
| Captive      | 2025/7/3      | M0B     | 0.416       | M   | C        |
| Captive      | 2025/7/3      | Ashiri  | 1.441       | M   | C        |
| Captive      | 2025/7/3      | Ashiri  | 1.441       | M   | F        |
| Captive      | 2025/7/3      | Ashiri  | 1.441       | M   | E        |
| Captive      | 2025/7/3      | Ashiri  | 1.441       | M   | E        |
| Captive      | 2025/7/3      | Ehu     | 2.441       | F   | F        |
| Captive      | 2025/7/3      | F2B     | 2.447       | F   | C        |
| Captive      | 2025/7/3      | F2B     | 2.447       | F   | E        |
| Captive      | 2025/7/3      | M2B     | 2.447       | M   | C        |
| Captive      | 2025/7/3      | M2B     | 2.447       | M   | E        |
| Captive      | 2025/7/3      | F2A     | 2.452       | F   | E        |
| Captive      | 2025/7/3      | M2A     | 2.452       | M   | C        |
| Captive      | 2025/7/3      | Alen    | 3.479       | M   | C        |
| Captive      | 2025/7/3      | Lucky   | 10.416      | F   | C        |
| Captive      | 2025/7/3      | Lucky   | 10.416      | F   | F        |
| Captive      | 2025/7/3      | Ana     | 10.477      | F   | F        |
| Captive      | 2025/7/3      | Sasuke  | 10.477      | M   | C        |
| Captive      | 2025/7/3      | Sasuke  | 10.477      | M   | E        |
| Captive      | 2025/7/3      | Tsurara | 12.397      | M   | C        |

|         |           |         |        |   |   |
|---------|-----------|---------|--------|---|---|
| Captive | 2025/7/3  | Maron   | 12.416 | F | C |
| Captive | 2025/7/24 | Dai     | 14.474 | M | C |
| Captive | 2025/7/24 | Dai     | 14.474 | M | E |
| Captive | 2025/7/24 | Dai     | 14.474 | M | E |
| Captive | 2025/7/24 | Towa    | 17.474 | F | C |
| Captive | 2025/7/24 | Towa    | 17.474 | F | E |
| Captive | 2025/7/3  | Sumiri  | 19.408 | F | C |
| Captive | 2025/7/3  | Sumiri  | 19.408 | F | F |
| Captive | 2025/7/3  | M19A    | 19.43  | M | C |
| Captive | 2025/7/3  | M19B    | 19.43  | M | E |
| Captive | 2025/7/3  | Becky   | 23.416 | F | C |
| Captive | 2025/7/3  | Becky   | 23.416 | F | F |
| Captive | 2025/7/3  | Moriko  | 24.416 | F | C |
| Captive | 2025/7/3  | Moriko  | 24.416 | F | F |
| Captive | 2025/7/3  | Red     | 26.334 | M | C |
| Captive | 2025/7/3  | Red     | 26.334 | M | F |
| Captive | 2025/7/3  | Suzuri  | 29.444 | F | F |
| Captive | 2025/7/3  | Regalia | 30.384 | F | F |
| Captive | 2025/7/3  | Shinko  | 34.416 | F | F |
| Captive | 2025/7/3  | Raisa   | 34.436 | F | F |
| Wild    | 2023/8/22 | 23BH01  | 0.553  | F | C |
| Wild    | 2023/9/30 | 23BH02  | 0.66   | F | C |
| Wild    | 2024/7/4  | 23BH02  | 1.421  | F | E |

|      |            |        |       |   |   |
|------|------------|--------|-------|---|---|
| Wild | 2022/9/27  | 21BH08 | 1.652 | F | C |
| Wild | 2022/11/2  | 21DH01 | 1.751 | M | C |
| Wild | 2022/11/8  | 21SS02 | 1.767 | M | C |
| Wild | 2023/7/16  | 21SS03 | 2.452 | F | C |
| Wild | 2023/8/10  | ON     | 2.521 | M | E |
| Wild | 2023/8/10  | ON     | 2.521 | M | E |
| Wild | 2022/9/27  | 20CH18 | 2.652 | M | C |
| Wild | 2022/5/5   | 20CH20 | 3.255 | F | E |
| Wild | 2022/6/3   | 20SS01 | 3.334 | M | C |
| Wild | 2024/6/4   | CY     | 3.339 | F | F |
| Wild | 2022/7/5   | LY     | 3.422 | F | E |
| Wild | 2023/8/14  | 20CH14 | 3.532 | M | F |
| Wild | 2023/8/15  | 20CH05 | 3.534 | F | F |
| Wild | 2022/9/27  | LY     | 3.652 | F | E |
| Wild | 2022/10/19 | LY     | 3.712 | F | E |
| Wild | 2022/10/31 | 20CH20 | 3.745 | F | C |
| Wild | 2023/11/5  | 20CH14 | 3.759 | M | C |
| Wild | 2022/6/6   | BU     | 4.342 | F | F |
| Wild | 2023/7/5   | GC     | 4.422 | F | F |
| Wild | 2023/8/23  | LY     | 4.556 | F | E |
| Wild | 2023/10/18 | LY     | 4.71  | F | C |
| Wild | 2023/7/4   | BU     | 5.419 | F | F |
| Wild | 2022/7/10  | 18SH03 | 5.436 | F | C |

|      |            |        |        |   |   |
|------|------------|--------|--------|---|---|
| Wild | 2022/10/19 | 18SH03 | 5.712  | F | E |
| Wild | 2021/6/2   | YN     | 7.332  | F | F |
| Wild | 2021/6/22  | BT     | 7.386  | F | F |
| Wild | 2024/10/1  | 18SH03 | 7.664  | F | E |
| Wild | 2023/7/4   | CR     | 8.419  | F | E |
| Wild | 2023/7/6   | CR     | 8.425  | F | E |
| Wild | 2025/8/1   | 18SH03 | 8.496  | F | F |
| Wild | 2023/9/30  | CR     | 8.66   | F | C |
| Wild | 2023/6/6   | DS     | 9.342  | F | C |
| Wild | 2023/7/5   | EI     | 9.422  | F | C |
| Wild | 2023/8/10  | EI     | 9.521  | F | F |
| Wild | 2024/5/28  | 17SS01 | 10.319 | F | C |
| Wild | 2024/10/1  | 17SS01 | 10.664 | F | E |
| Wild | 2024/11/5  | BT     | 10.759 | F | C |
| Wild | 2024/11/5  | KP     | 10.759 | F | C |
| Wild | 2022/7/5   | GI     | 12.422 | F | C |
| Wild | 2022/7/5   | GI     | 12.422 | F | E |
| Wild | 2022/11/8  | HC     | 15.767 | F | C |
| Wild | 2024/7/4   | HC     | 17.421 | F | E |
| Wild | 2023/9/14  | DR     | 19.617 | F | C |
| Wild | 2023/9/14  | DR     | 19.617 | F | F |
| Wild | 2021/10/14 | RI     | 19.699 | F | C |
| Wild | 2021/10/25 | WK     | 19.729 | F | C |

|      |            |    |        |   |   |
|------|------------|----|--------|---|---|
| Wild | 2021/6/15  | KR | 20.367 | F | F |
| Wild | 2022/10/17 | WK | 20.707 | F | E |
| Wild | 2022/11/7  | WK | 20.764 | F | E |
| Wild | 2022/11/7  | WK | 20.764 | F | E |
| Wild | 2023/8/22  | KR | 22.553 | F | C |
| Wild | 2024/7/3   | LI | 28.418 | F | C |

Sex: M, male; F, female

Analysis: C, used for model construction; E, used for model evaluation; F, methylation level analysis was failed

**Supplementary Table S\_M2.** Primer information and PCR conditions.

| Adjacent gene      | Step | Annealing temperature (°C) | PCR product size (bp)  | Sequence 5' to 3'                                                                                     |
|--------------------|------|----------------------------|------------------------|-------------------------------------------------------------------------------------------------------|
| <i>DLX5</i>        | 1    | 54                         | 96                     | F: GGGTGGGGGAATAAAGGTATA<br>R: CCACCTAAAATCCCAAATACCTAC                                               |
|                    | 2    | 56                         | 116                    | F: GGGTGGGGGAATAAAGGTATA<br>R: GGGACACCGCTGATCGTTTACCACCTAAAATCCCAAATACCTAC<br>B: GGGACACCGCTGATCGTTA |
| <i>SLC12A5</i>     | S    |                            |                        | GTTATAGGGTTATTTAGAGGT                                                                                 |
|                    | 1    | 56                         | 121                    | F: GGGTGGTTTGGAGTTTTGT<br>R: CTACCCCRAACTATAAACAAT                                                    |
|                    | 2    | 58                         | 141                    | F: GGGTGGTTTGGAGTTTTGT<br>R: GGGACACCGCTGATCGTTTACTACCCCRAACTATAAACAAT<br>B: GGGACACCGCTGATCGTTA      |
|                    | S    |                            | AGGAGTTGTTAGAGGTGTTGGA |                                                                                                       |
| <i>F2 Intorn12</i> |      | 60                         | 101                    | F: AGGGTAAGTCCAAGGCATGAC<br>R: GCTGGTGGGTAGAGCTTCTGG                                                  |

F: forward primer; R: reverse primer; B: 5'-biotin-modified primer; S: sequencing primer; Mixed base: R = G+A

**Supplementary Table S\_M3.** Details of the synthetic F2 intron 12 sequence used for host DNA copy number quantification by qPCR.

|                                   |                                                                                                           |
|-----------------------------------|-----------------------------------------------------------------------------------------------------------|
| <b>Gene name</b>                  | F2_Intron_12                                                                                              |
| <b>Sequence length (bp)</b>       | 101                                                                                                       |
| <b>Inserted vector</b>            | pUCFa                                                                                                     |
| <b>Target region (Brown bear)</b> | NW_020656153.1,<br>1,273,581–1,273,681                                                                    |
| <b>Target sequence</b>            | AGGGTAAGTCCAAGGCATGACAGCAGTACCCTGTCAGGCAACTATTTCTGAAAACAGTCCCTCCTTACTCAC<br>CCCCGCTCCCAGAAGCTCTACCCACCAGC |

**Supplementary Table S\_R1.** Workflow of the study and changes in the numbers of samples and bears at each stage.

|                                     | Wild bears            |     |                       |     |                  |                     | Captive bears    |         |     |         |     |                  |                    |                  |
|-------------------------------------|-----------------------|-----|-----------------------|-----|------------------|---------------------|------------------|---------|-----|---------|-----|------------------|--------------------|------------------|
|                                     | Success <sup>a)</sup> |     | Failure <sup>b)</sup> |     | No. Samples      | Bears <sup>c)</sup> | Age <sup>s</sup> | Success |     | Failure |     | No. Samples      | Bears <sup>#</sup> | Age <sup>s</sup> |
|                                     | 3/3                   | 2/3 | 1/3                   | 0/3 |                  |                     |                  | 3/3     | 2/3 | 1/3     | 0/3 |                  |                    |                  |
| <b>Sampling</b>                     |                       |     |                       |     | 1307             |                     |                  |         |     |         |     | 112              | 33                 | 0–34             |
| ↓                                   |                       |     |                       |     |                  |                     |                  |         |     |         |     |                  |                    |                  |
| <b>Microsatellite</b>               |                       |     |                       |     | 1005             | 255                 |                  |         |     |         |     | 72               | 26                 | 0–34             |
| ↓                                   |                       |     |                       |     |                  |                     |                  |         |     |         |     |                  |                    |                  |
| <b>Purification</b>                 |                       |     |                       |     | 55               | 31                  | 0–28             |         |     |         |     | 40               | 26                 | 0–34             |
| ↓                                   |                       |     |                       |     |                  |                     |                  |         |     |         |     |                  |                    |                  |
| <b>First PCR</b>                    | 44                    | 3   | 5                     | 3   | 47 <sup>e)</sup> | 27                  | 0–28             | 28      | 6   | 4       | 2   | 34 <sup>e)</sup> | 22                 | 0–34             |
| ↓                                   |                       |     |                       |     |                  |                     |                  |         |     |         |     |                  |                    |                  |
| <b>Second PCR</b>                   | 30                    | 13  | 3                     | 1   | 43 <sup>f)</sup> | 26                  | 0–28             | 26      | 6   | 2       | 0   | 32 <sup>f)</sup> | 21                 | 0–26             |
| ↓                                   |                       |     |                       |     |                  |                     |                  |         |     |         |     |                  |                    |                  |
| <b>Pyrosequencing</b>               | 30                    | 13  | 0                     | 0   | 43 <sup>g)</sup> | 26                  | 0–28             | 14      | 14  | 3       | 1   | 28 <sup>g)</sup> | 20                 | 0–26             |
| ↓                                   |                       |     |                       |     |                  |                     |                  |         |     |         |     |                  |                    |                  |
| <b>qPCR (&gt;1392 copies)</b>       |                       |     |                       |     | 37               | 25                  | 0–28             |         |     |         |     | 24               | 18                 | 0–26             |
| ↓                                   |                       |     |                       |     |                  |                     |                  |         |     |         |     |                  |                    |                  |
| <b>Age estimation models</b>        |                       |     |                       |     | 25               | 25                  | 0–28             |         |     |         |     | 18               | 18                 | 0–26             |
| <b>Model performance evaluation</b> |                       |     |                       |     | 18               | 10                  | 1–20             |         |     |         |     | 10               | 8                  | 1–19             |

<sup>a)</sup> Success (3/3 and 2/3) indicates number of samples for which all or two among three replicates were successfully analyzed for PCR or pyrosequencing.

<sup>b)</sup> Failure (1/3 and 0/3) indicates number of samples for which one or none among three replicates were successfully analyzed for PCR or pyrosequencing. <sup>c)</sup> Bears: Number of unique bears. <sup>d)</sup> Age: Range of ages of the bears. <sup>e, f, g)</sup> Number of successful samples for first-, second-PCR, and pyrosequencing, respectively.

**Supplementary Table S\_R2.** Regression coefficients of the Elastic Net model.

| <b>Variable</b> | <b>Coefficient (<math>\beta</math>)</b> | <b>Interpretation</b>         |
|-----------------|-----------------------------------------|-------------------------------|
| Intercept       | 2.32E-11                                |                               |
| DLX5-1          | 0.1033                                  | Positive correlation with age |
| DLX5-2          | 0.1577                                  | Positive correlation          |
| DLX5-3          |                                         | Not retained in model         |
| SLC12A5-1       | 0.0990                                  | Positive correlation          |
| SLC12A5-2       | 0.1414                                  | Positive correlation          |
| SLC12A5-3       | 0.1628                                  | Positive correlation          |
| SLC12A5-4       | 0.2348                                  | Positive correlation          |

**Supplementary Table S\_R3.** Optimized parameters for the elastic net regression and SVR models.

| Model                     | Used CpGs*                   | Alpha | Lamda     | Cost      | Gamma      | Epsilon |
|---------------------------|------------------------------|-------|-----------|-----------|------------|---------|
| Elastic net regression    | D-1, -2 S-1, -2, -3, -4      | 0.07  | 0.1623554 |           |            |         |
| Support vector regression | D-1, -2, -3, S-1, -2, -3, -4 |       |           | 0.6309573 | 0.03162278 | 0.1     |
|                           | D-1, -2, S-1, -2, -3, -4     |       |           | 0.6309573 | 0.03162278 | 0.1     |
|                           | D-1, -2, S-2, -3, -4         |       |           | 0.6309573 | 0.03981072 | 0.1     |
|                           | D-2, S-2, -3, -4             |       |           | 0.6309573 | 0.06309573 | 0.1     |
|                           | D-2, S-3, -4                 |       |           | 0.6309573 | 0.06310    | 0.1     |
|                           | D-1, -2, -3                  |       |           | 3.162278  | 0.1995262  | 0.1     |
|                           | D-1, -2                      |       |           | 19.95262  | 0.1995262  | 0.1     |
|                           | S-1, -2, -3, -4              |       |           | 79.43282  | 0.1258925  | 0.1     |
|                           | S-2, -3, -4                  |       |           | 0.7943282 | 0.07943282 | 0.1     |
|                           | S-3, -4                      |       |           | 0.7943282 | 0.1        | 0.1     |

\*D and S represent DLX5 and SLC12A5, respectively.

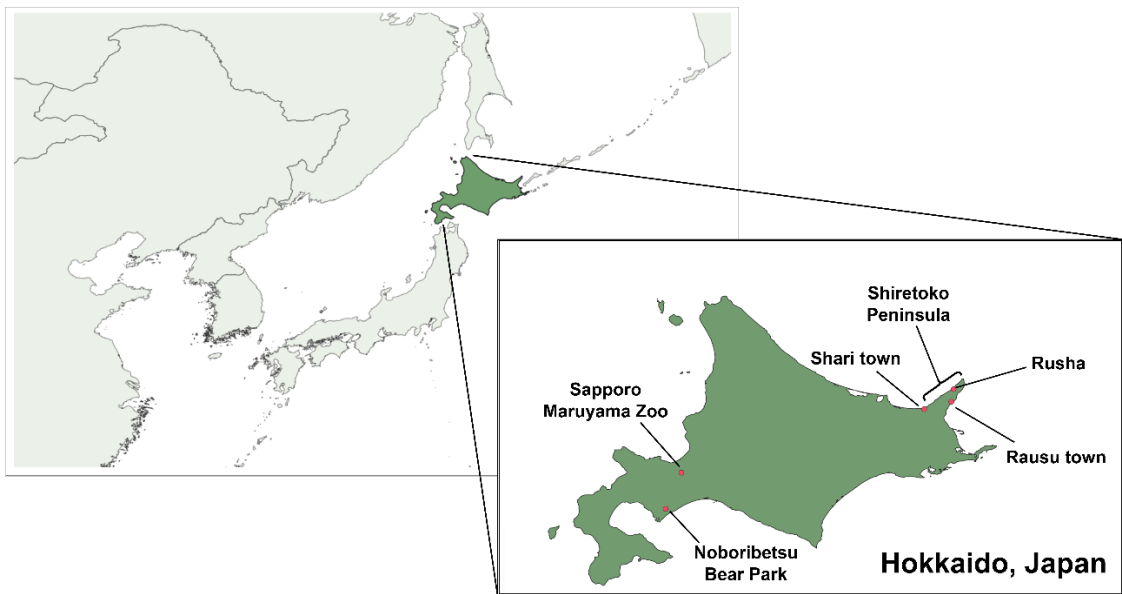

**Supplementary Figure S\_M1.** Map of Hokkaido, Japan, showing Noboribetsu Bear Park, Sapporo Maruyama Zoo and the Rusha area of the Shiretoko Peninsula.

**DLX5**

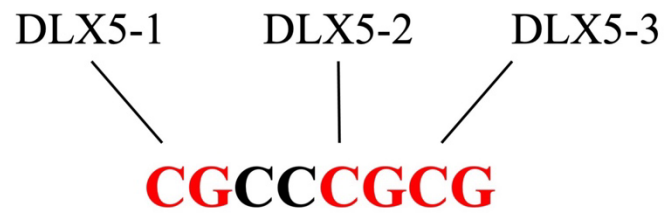

**SLC12A5**

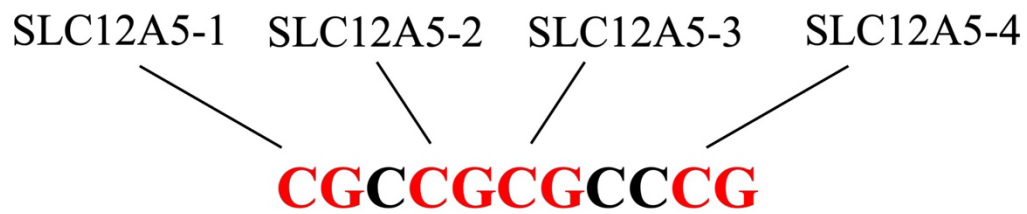

**Supplementary Figure S\_M2.** The nucleotide sequences used for pyrosequencing analysis and the names of the CpG sites used in this study. CpG sites are indicated in red.

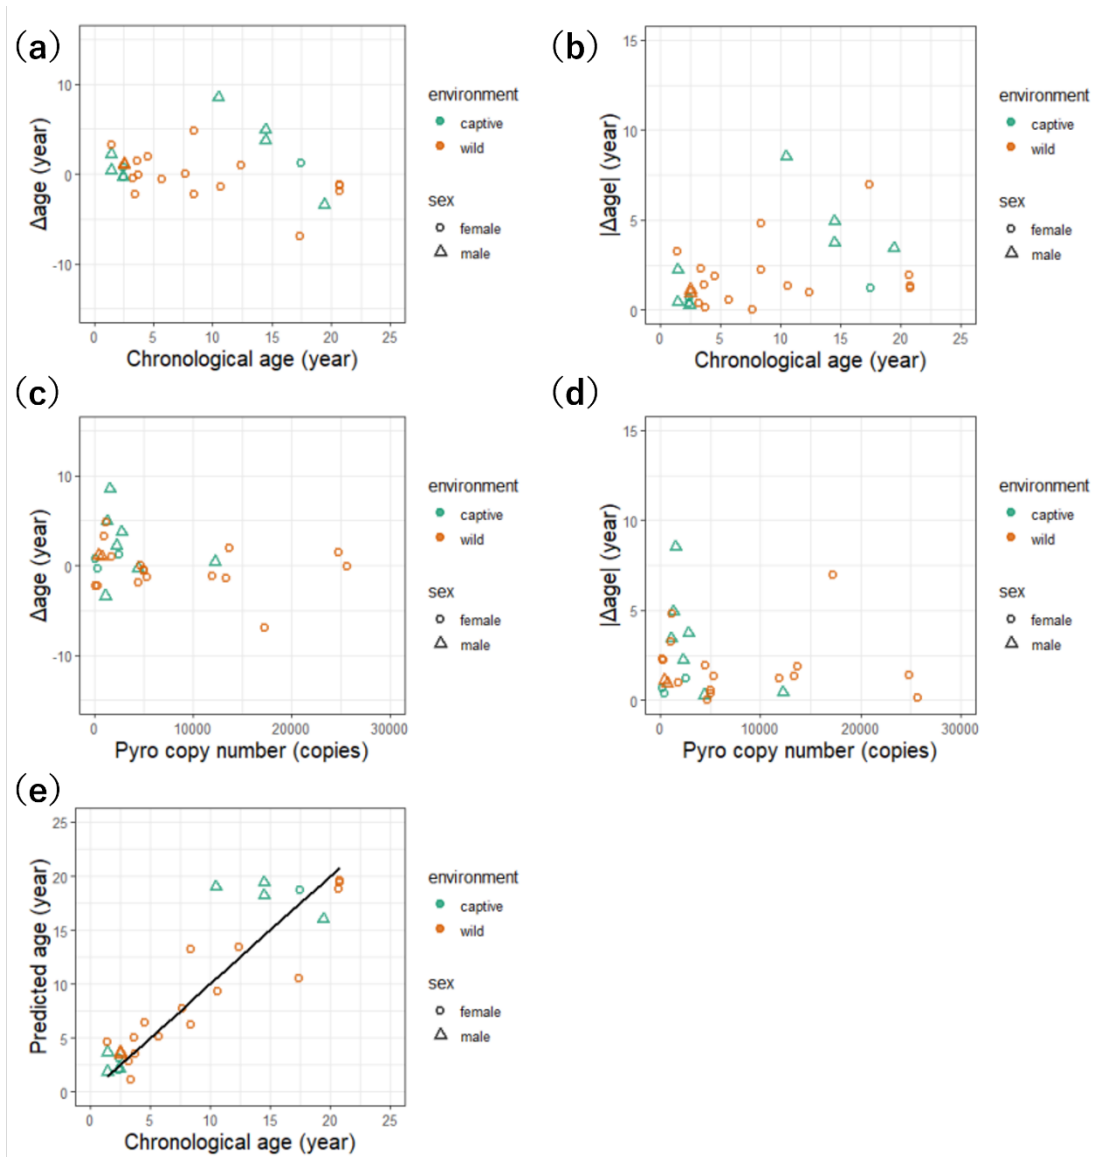

**Supplementary Figure S\_R1.** Scatter plot of  $\Delta$ age (years) versus chronological age (years) in captive and wild brown bears (a). Scatter plot of  $|\Delta$ age| (years) versus chronological age (years) in captive and wild brown bears (b). Scatter plot of  $\Delta$ age versus the number of host DNA copies added to the first PCR (c). Scatter plot of  $|\Delta$ age| (years) versus the number of host DNA copies added to the first PCR (d). Scatter plot of predicted age (years) versus chronological age (years) (e). The solid line represents predicted age = chronological age. All of the above data were generated by using samples not included in the model construction.
